# Supplementary material
Source: publisher figshare collection journal article supplement (https://gsajournals.figshare.com/ndownloader/files/12715907)
Supplement: Supplementary file 1 [file 12715907]

## Sheet: Table S2
Table S2: Oligonucleotides used in this study
Name	Sequence
mut_AmpR_For	GGAGCCGGTGAGCGTGGGTCCCGCGGTATCATTGCAGCAC
mut_AmpR_Rev	GTGCTGCAATGATACCGCGGGACCCACGCTCACCGGCTCC
mut_URA3_For	AGAACCGTGGATGATGTGGTATCTACAGGATCTGACATTA
mut_URA3_Rev	TAATGTCAGATCCTGTAGATACCACATCATCCACGGTTCT
Backbone_For	ACGCGCCCTGTAGCGGCGC
Backbone_Rev	GCAAATTAAAGCCTTCGAGC
DYSCKO_For	GCGCCGCTACAGGGCGCGT
DYSCKO_Rev	GCTCGAAGGCTTTAATTTGC
gRNA_for	CAGAGCATAAGGAGGGTCTC
gRNA_rev	ATACCTCGCTCATGGTCTCT
g.ADE1	CATAAGGAGGGTCTCCTGATCGTCAATTACGAAGACTGAACGTTTAGAGACCATGAGCGA
g.VPS35	CATAAGGAGGGTCTCCTGATCTAGACACCGGTTCATTAGTGGTTTAGAGACCATGAGCGA
CAN1_for	TACAAAGTTCCACTGGCGGC
CAN1_rev	TTTGATGGCTCTTGGAACGG
ADE1_for	TTTGAGGTAAGACGGTTGGG
ADE1_rev	TGTGAACCAATAGAGAGCGG
VPS35-A	TCCTATTATCCCTTCCATCAATACA
SDD3_for	TGCAACTGTCGATTCG
SDD3_rev	GCATAGTTTCTACATTACTCTCC
POL1_for	ATATCAGGGTGGTTTAGTTT
POL1_rev	ACCCTTATTAGTGACTAACATG
ILV3_for	CTATTGGACTTGAATAACAGAT
ILV3_rev	GTCAAACCTAGCACTTCAG
RSC3_for	GGTCCGTACTTAAACTCTTAT
RSC3_rev	CTTAATTGTCAAAAACTCCTC
YMT1_for	GTGAATTGTTACGTACTTCATT
YMT1_rev	GTATGATGCAGATAATATTCTTG
CDC24_for	GGCACATCTTTATCCG
CDC24_rev	GAGACTGGTAGCTGTGG
ARP9_for	GAAATACCAACACAGATTTATC
ARP0_rev	TCAATGATTCTATCTGATCATC
